# Supplementary material for: Reasons for (not) choosing dental treatments—A qualitative study based on patients’ perspective
Source: PubMed Central journal article supplement (PMC9132305; doi:10.1371/journal.pone.0267656), 2022-05-25
Supplement: pone.0267656.s003.pdf [file pone.0267656.s003.pdf]

Dear participant\* \_\_\_\_\_,

we ask you to answer the following questions. Your answers will be treated absolutely confidentially.

(1) What type of health insurance are you a member of?

(1.1) Statutory health insurance (SHI)  yes  no  I don't know

(1.1.1) I have compulsory insurance  yes  no  I don't know

(1.1.2) I am voluntarily insured  yes  no  I don't know

(1.1.2) I have family insurance  yes  no  I don't know

(1.2) Private health insurance (PHI)  yes  no  I don't know

(2) Do you have a dental supplementary insurance?  yes  no  I don't know

(3) Do you receive allowances in case of need,  
e.g. for civil servants and soldiers?  yes  no  I don't know

(4) Do you own a "Bonus booklet"?  yes  no  I don't know

(4.1) Have you ever benefited from your "Bonus booklet",  
i.e., has it ever reduced the amount of  
your out-of-pocket payment?  yes  no  I don't know

(5) Do you use a "Bonus program" of your health insurance?  yes  no  I don't know

(5.1) Have you ever benefited from the "Bonus program",  
i.e., has it ever reduced the amount of  
your out-of-pocket payment?  yes  no  I don't know

(6) Have you ever undergone a dental treatment for that  
you had to make an out-of-pocket payment?  yes  no  I don't know

(7) Has your dentist ever presented you different alternatives  
in advance of a dental treatment (and related costs),  
e.g., tooth-filling with high-quality plastic instead of amalgam?  yes  no  I don't know

\* Your first name or self-chosen name by which you were addressed in the discussion group

(8) How old are you? \_\_\_\_\_years

(9) What is your gender?  female  male  other

(10) What is your highest educational qualification?

- (Technical) university degree
- Vocational training
- Graduation after 13 school years (A-level)
- Graduation after 10 school years
- Graduation after 9 school years
- No school graduation
- No answer
- Other: \_\_\_\_\_

(11) Are you currently employed?

- Yes, I am fulltime employed
- Yes, I am part-time employed
- I am a student
- No, I am unemployed
- No, I receive pension due to illness
- No, I receive pension due to age
- Other: \_\_\_\_\_

(12) What is your net household income per month?

- < 500€
- 500 to < 750€
- 750 to < 1.000€
- 1.000 to < 1.500€
- 1.500 to < 2.500€
- 2.500 to < 3.500€
- 3.500 to < 4.500€
- 4.500 to < 5.500€
- 5.500 to < 6.500€
- > 6.500€

(7) How did you hear about the discussion groups?

- Flyer / notice at TU Berlin  in grocery store
- Newspaper advert in "Berliner Woche"
- Advert at "eBay Kleinanzeigen"
- Post at "Facebook"
- E-Mail from TU Berlin mailing list
- Other: \_\_\_\_\_

We are interested in your opinion:

What did you particularly like about the discussion group? \_\_\_\_\_

---

---

---

What did you not like about the discussion group at all? \_\_\_\_\_

---

---

---

Thank you for participating!
